# Supplementary material
Source: ML conference proceedings conference paper supplement (https://proceedings.neurips.cc/paper_files/paper/2023/hash/17a234c91f746d9625a75cf8a8731ee2-Abstract.html)
Supplement: Supplementary file 1 [file 17a234c91f746d9625a75cf8a8731ee2-Supplemental-Conference.zip]

Archive with 8 entries (8 files):
- SupplementalVideo1.mp4
- __MACOSX/._SupplementalVideo1.mp4
- SupplementalVideo2.mp4
- __MACOSX/._SupplementalVideo2.mp4
- SupplementalVideo3.mp4
- __MACOSX/._SupplementalVideo3.mp4
- SupplementaryMethodsResults.pdf
- __MACOSX/._SupplementaryMethodsResults.pdf
